# Supplementary material
Source: Springer Nature journal article supplement (https://www.springermedizin.de/resource/supplementary/13053_2013_455_MOESM2_ESM.pdf/9673890)
Supplement: MOESM2 [file 9673890]

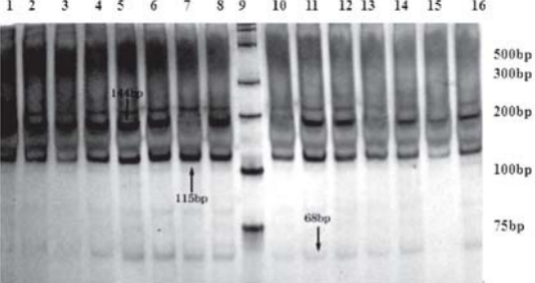

**Lane 1, 2, 3, 15 : Homozygous C/C genotype**

**Lane 7, 10, 13 : Homozygous T/T genotype**

**Lane 9 : 75bp DNA Fragment Marker**

**Lane 4, 5, 6, 8, 11, 12, 14, 16 : Heterozygous C/T genotype**
